# Supplementary material for: Controlled Synthesis of Pd/Pt Core Shell Nanoparticles Using Area-selective Atomic Layer Deposition
Source: PubMed Central journal article supplement (PMC4329547; doi:10.1038/srep08470), 2015-02-16
Supplement: srep08470-s1.pdf [file srep08470-s1.pdf]

## Supplementary Information

### Controlled Synthesis of Pd/Pt Core Shell Nanoparticles Using Area-selective Atomic Layer Deposition

Kun Cao<sup>1,2</sup>, Qianqian Zhu<sup>1,2</sup>, Bin Shan<sup>2\*</sup>, and Rong Chen<sup>1\*</sup>

<sup>1</sup>State Key Laboratory of Digital of Manufacturing Equipment and Technology, School of Mechanical Science and Engineering, <sup>2</sup>State Key Laboratory of Material Processing and Die & Mould Technology, School of Materials Science and Engineering, Huazhong University of Science and Technology, 1037 Luoyu Road, Wuhan, Hubei PR China 430074

Corresponding Author

\*Email: rongchen@mail.hust.edu.cn, bshan@mail.hust.edu.cn;

**Table S1:** The statistical analysis of 300 cycles Pd nanoparticles grown on ODTS SAMs modified Si substrate with 0, 10min, 2h dip time.

| substrate  | Coverage (%) | Density (counts/um <sup>2</sup> ) | Average diameter (nm) | Diameter $\sigma$ (nm) |
|------------|--------------|-----------------------------------|-----------------------|------------------------|
| Si         | 20.8         | $5.6 \times 10^3$                 | 7.1                   | 3.8                    |
| 10min ODTS | 12.1         | $3.7 \times 10^3$                 | 6.3                   | 1.9                    |
| 2h ODTS    | 8.7          | $2.6 \times 10^3$                 | 5.1                   | 1.7                    |

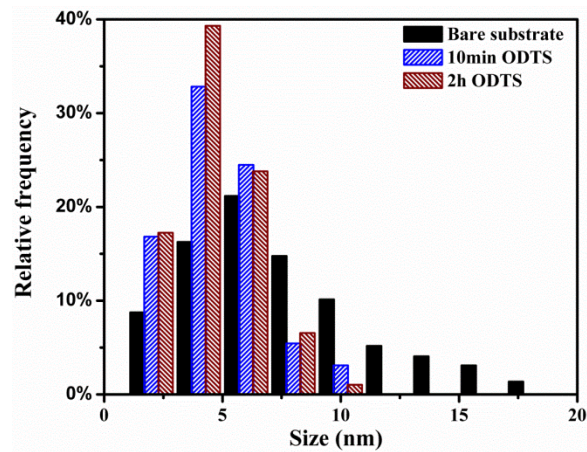

**Figure S1.** Particles size distribution of 300 cycles Pd on ODTS SAMs modified Si wafer with 0, 10min, 2h dip time.

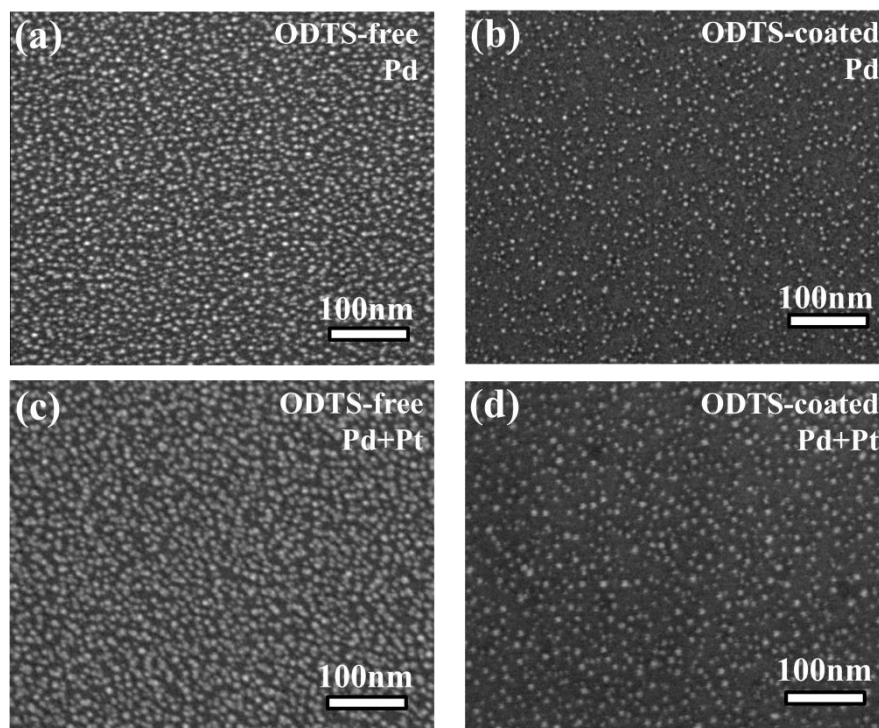

**Figure S2.** FSEM images of (a) 300 cycles of Pd on ODTS-free Si substrate, (b) 300 cycles of Pd +25 cycles of Pt on ODTS-free Si substrate; (c) 300 cycles of Pd on 2 h ODTS-coated Si substrate, (d) 300 cycles of Pd +25 cycles of Pt on 2 h ODTS-coated Si substrate.

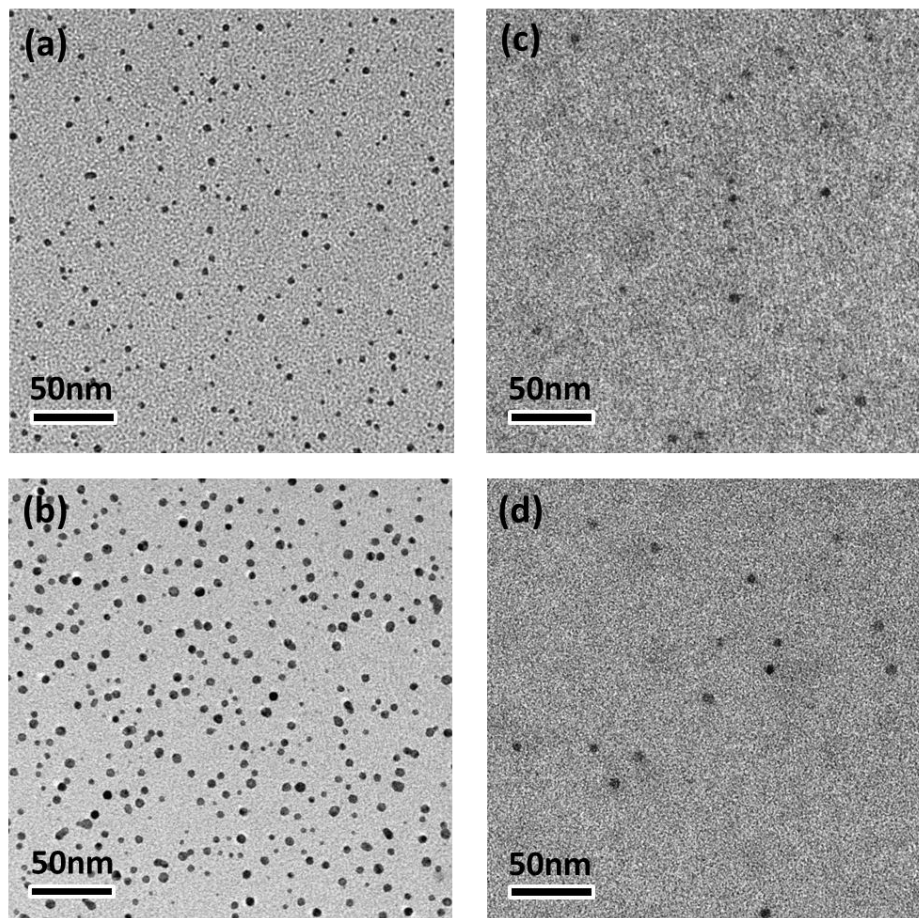

**Figure S3.** TEM characterization of the noble metal NPs on  $\sim 3\text{nm}$   $\text{Al}_2\text{O}_3$  pre-covered carbon grids. (a) 300 cycles Pd (b) 300 cycles Pd + 25 cycles Pt on bare  $\text{Al}_2\text{O}_3$ . Images (c) 300 cycles Pd, (d) 300 cycles Pd + 25 cycles Pt demonstrate the NPs grown on the 2h ODTs SAMs modified  $\text{Al}_2\text{O}_3$  surface.

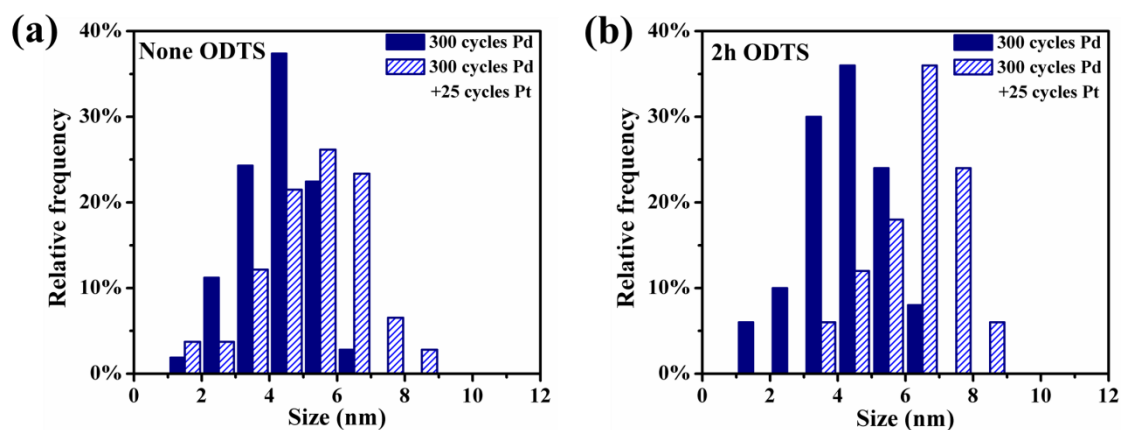

**Figure S4.** Particles size distribution analysis of the NPs on bare substrate and 2h ODTS modified substrate utilizing the TEM images in Figure S2. Histograms are made by counting 200 particles.

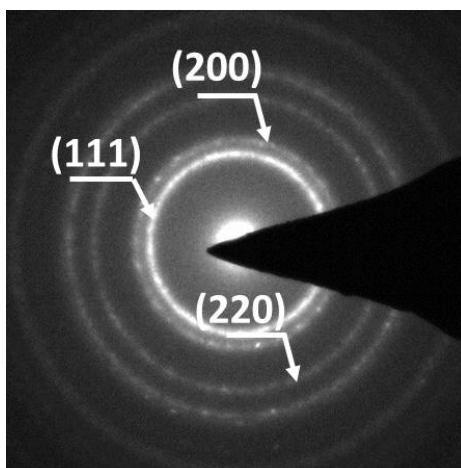

**Figure S5.** The selected area electron diffraction (SAED) pattern of core shell NPs of 300 cycles Pd followed with 25 cycles Pt on 2h ODTS SAMs.

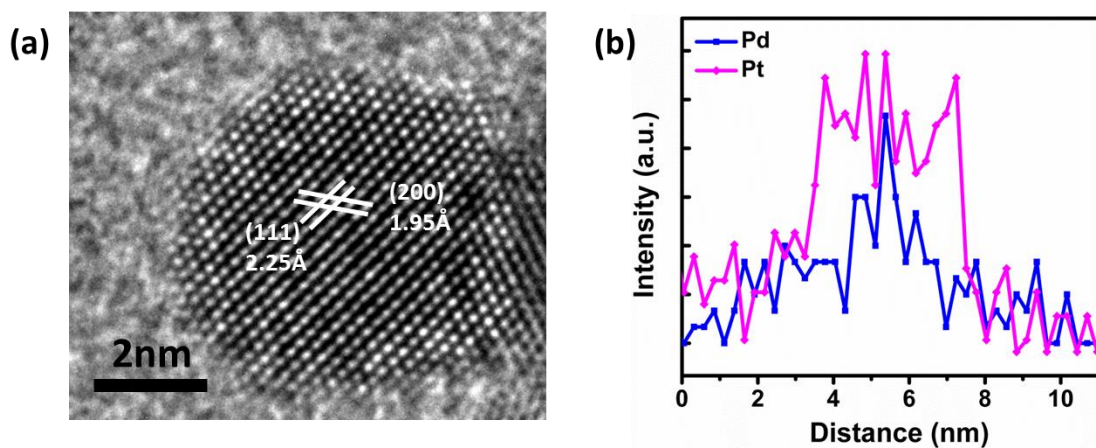

**Figure S6.** (a) HRTEM images of Pd core (300 cycles) Pt shell (25 cycles) on 2h ODTs modified  $\text{Al}_2\text{O}_3$  film on carbon grid, (b) corresponding EDX line scan profile.

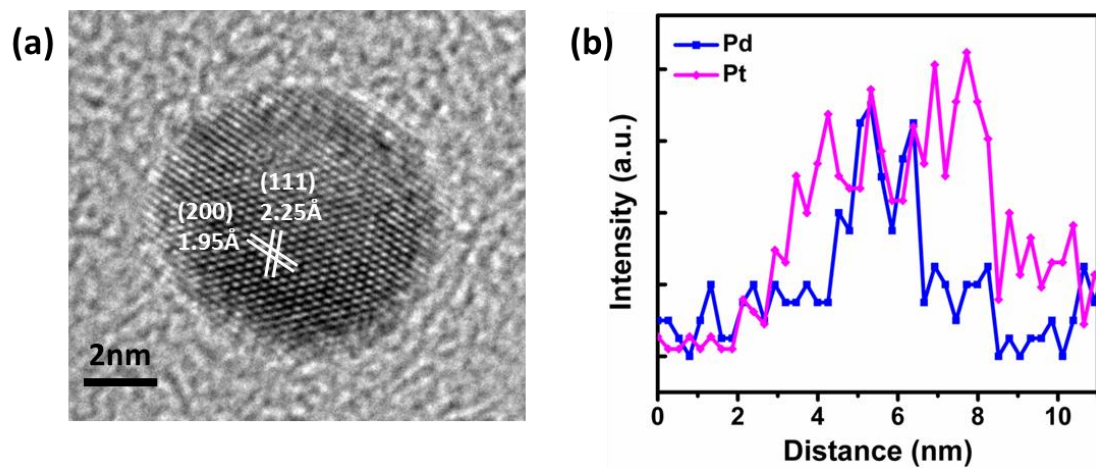

**Figure S7.** (a) HRTEM images of Pd core (300 cycles) Pt shell (25 cycles) after atmospheric environment annealing at 400 °C for 1h, (b) corresponding EDX line scan profile.
